# Supplementary material
Source: HighWire-hosted journal article supplement (https://bmjoncology.bmj.com/content/2/1/e000014)
Supplement: inline-supplementary-material-2 [file inline-supplementary-material-2.pdf]

## Supplemental file 2: Spanish: Demographic survey for focus group discussion participants

### A. INTRODUCCIÓN

Gracias por su interés en nuestro estudio. Este estudio ha sido diseñado por un equipo diverso de investigadores de salud sexual y reproductiva que incluye personas que se identifican como transgénero, no binario, de género expansivo y cisgénero y tienen diversas orientaciones sexuales.

Para la mayoría de los servicios de salud y estudios de investigación, si puede participar o no depende de su género o sexo. Sin embargo, en este estudio, exploraremos nuevas formas de determinar si alguien es elegible para recibir atención médica o participar en una investigación. Estas nuevas preguntas no dependen del género o el sexo asignado al nacer. Sus respuestas nos ayudarán a comprender cuándo se deben hacer estas nuevas preguntas, si es que se deben hacer. El objetivo es diseñar preguntas que identifiquen mejor quién es elegible para tipos de atención clínica y estudios de investigación, lo que conducirá a una atención clínica e investigaciones más precisas e inclusivas, mejor ciencia y mejores resultados de salud para todas las personas.

Esta encuesta debería tardar unos 5 minutos en completarse. Recuerde cerrar la ventana de su navegador después de enviar sus respuestas para evitar que alguien vea sus respuestas.

### B. ALIAS PARA LA DISCUSIÓN DEL GRUPO FOCAL

0. Para proteger su confidencialidad, ¿qué nombre le gustaría que vieran los participantes durante la discusión del grupo focal? Este nombre será su "alias", o el nombre que aparece en el chat del grupo focal en línea que verán otros participantes. Muchas personas prefieren usar un nombre falso para que sus respuestas permanezcan anónimas.

### C. GÉNERO

1. El género de una persona es un concepto interno importante de sí mismo que puede incluir chica / mujer, chico / hombre, una combinación de ambos, ninguno y muchos más. El género es cómo cada persona piensa de sí misma y cómo se llama a sí misma. El género de una persona puede ser consistente o diferente al género comúnmente asumido para su sexo asignado al nacer. Las palabras que una persona usa para hablar sobre su género pueden cambiar con el tiempo.

¿Cuál es su género / cómo describe su género?

---

2. Si tuviera que elegir de la lista a continuación, aunque reconocemos que estas categorías pueden no ser ideales y que el género no es necesariamente una identidad fija y puede cambiar con el tiempo, ¿cuál de las siguientes describe mejor su género actual? (Seleccione todas las que correspondan)
  - Agénero (sin género)
  - Genderqueer
  - Hombre
  - No binario
  - Two-Spirit (puede incluir el idioma específico de su tribu para su identidad, si lo desea) \_\_\_\_\_

- Mujer
  - Categoría de género adicional, especifique: \_\_\_\_\_
  - Prefiero no responder
3. ¿Se identifica como transgénero y / o se considera una persona de experiencia transgénero?
- Sí
  - No
  - No lo sé
  - Prefiero no responder
4. ¿Se identifica como intersexual?
- No
  - Sí
  - Prefiero no responder
5. ¿Alguna vez un proveedor de atención médica le ha dicho que es intersexual o que tiene lo que a veces se denomina "diferencia en el desarrollo sexual" o "trastorno del desarrollo sexual" (TDS)?
- No
  - Sí
  - No sé
  - Prefiero no responder
6. ¿Puede decirnos más sobre lo que le dijo su proveedor de atención médica sobre su diagnóstico específico? (El diagnóstico de ser intersexual o tener un TDS)
- \_\_\_\_\_
- \_\_\_\_\_
- \_\_\_\_\_

**D. HISTORIAL DE SALUD.** Las siguientes preguntas se referirán a los servicios relacionados con la salud o las pruebas de detección que puede haber tenido.

7. En los últimos DOS AÑOS, seleccione todos y cada uno de los procedimientos que haya tenido:
- Prueba de Papanicolaou (una prueba de Papanicolaou es un procedimiento en el que un médico recolecta células del cuello uterino para detectar signos de cáncer de cuello uterino)
  - Mamografía (una mamografía es una imagen de rayos X del tejido de la mama / pecho para detectar el cáncer de mama)
  - Examen de próstata (un examen de próstata implica que un médico introduzca un dedo enguantado dentro del recto para palpar el agrandamiento de la próstata, un signo de posible cáncer de próstata)
  - Otro: \_\_\_\_\_
  - Prefiero no responder
8. En su VIDA, ¿alguna vez le han diagnosticado lo siguiente?

- Virus de inmunodeficiencia humana (VIH)
- Cáncer de mama
- Cáncer de cuello uterino
- Cáncer de ovarios
- Cáncer de próstata
- Cáncer testicular
- Otro tipo de cáncer: \_\_\_\_\_
- Ninguna de las anteriores
- No sé
- Prefiero no responder

E. **CARACTERÍSTICAS SOCIODEMOGRÁFICAS.** En esta última sección, haremos algunas preguntas más para ayudarnos a comprender más sobre usted. Sus respuestas a estas preguntas nos darán una mejor comprensión de quiénes están incluidos en este estudio.

9. ¿En qué estado vive actualmente? \_\_\_\_\_

10. ¿Qué edad tiene hoy? \_\_\_\_\_

11. ¿Qué pronombres usa (selecciona todos los que correspondan)?

- Él
- Ella
- Elle
- No uso pronombres, solo uso mi nombre.
- Otro: \_\_\_\_\_
- Prefiero no responder

12. ¿Usted se considera: (seleccione todo lo que corresponda)...?

- Asexual
- Bisexual
- Gay
- Lesbiana/e
- Pansexual
- Queer
- Cuestionándose
- Amante del mismo género
- Heterosexual
- Otra orientación sexual (especifique): \_\_\_\_\_

13. ¿Cuál es el nivel más alto de la escuela que ha completado?

- Alguna escuela secundaria o menos
- Título de escuela secundaria o GED
- Escuela técnica o comercial, sin título
- Título de escuela técnica o comercial
- Algo de Universidad, sin título
- Título universitario
- Estudios de posgrado o profesionales, sin título de posgrado
- Licenciatura posgrada o título profesional

14. ¿Qué categorías describe mejor su raza? (seleccione todas las que correspondan)
- Indígena americana o nativa de Alaska: ¿a qué tribu (s) está afiliado? \_\_\_\_\_
  - Negra o afroamericana
  - De descendencia centroasiática
  - De descendencia asiática oriental
  - Hispana o Latina
  - De descendencia del medio oriente o norteafricana
  - Nativa de Hawaii o de las Islas Pacificas
  - De descendencia surasiática
  - De descendencia asiática del sudeste
  - Blanca
  - Desconocida
  - No incluida (especifique): \_\_\_\_\_
  - Ninguna de las anteriores
15. ¿Qué tipo de seguro médico tiene? (seleccione todas las que correspondan)
- Ninguno
  - Seguro médico privado (del empleador o que usted u otra persona pague)
  - Medicaid
  - Medicare
  - TRICARE o seguro médico militar
  - Indian Health Service
  - Otro (especifique) \_\_\_\_\_
  - No sé
40. ¿Cómo describiría su situación laboral en este momento?
- Empleade a tiempo completo (40 horas o más por semana) y no soy estudiante
  - Empleade a tiempo parcial (hasta 39 horas por semana) y no soy estudiante
  - Empleade a tiempo completo (40 horas o más por semana) y soy estudiante
  - Empleade a tiempo parcial (hasta 39 horas por semana) y soy estudiante
  - Estudiante a tiempo completo o parcial, no empleade
  - Trabajo por cuenta propia
  - Desempleade
  - Retirade
  - Incapaz de trabajar
  - No incluido (especifique): \_\_\_\_\_
  - Ninguna de las anteriores
16. ¿Usted es xadre? Esto incluye la crianza de hijos que ahora son adultes, han fallecido o no están relacionadas biológicamente con usted.
- Sí
  - No
  - Prefiero no responder
17. Indique cómo se convirtió en xadre. **Seleccione todas las que correspondan.**
- El óvulo fue fertilizado a través de la actividad sexual con otre xadre del niño
  - Llevé a le niño por un embarazo y también fui la fuente de óvulos para le niño

- Llevé a le niño durante un embarazo, pero NO fui la fuente de óvulos
- Le proporcioné el óvulo para el embarazo que otra persona llevó.
- Le proporcioné el esperma
- Adopté a le niño
- Utilicé esperma de donante (anónimo)
- Utilicé esperma de donante (conocido)
- Me sometí a la adopción por una segunda madre de le hijo biológico de mi pareja.
- Trabajé con una sustituta para llevar el embarazo
- Trabajé con una donante de óvulos para proporcionar la fuente de óvulos para el embarazo
- Soy madre de le niño
- Soy una madre adoptiva (foster parent) de le niño
- Me convertí en madre a través de otro método  
(especifique): \_\_\_\_\_
- Ninguna de las anteriores

**FIN DE LA ENCUESTA:**

Muchas gracias por su participación en este estudio. Le enviaremos un correo electrónico o le llamaremos pronto con información detallada de inicio de sesión para la discusión de su grupo focal en línea. Esperamos su participación.

Si tiene preguntas sobre esta encuesta o su participación en este estudio, comuníquese con Anu Manchikanti Gómez al 510-642-0722 o [anugomez@berkeley.edu](mailto:anugomez@berkeley.edu).
